# Supplementary material for: Environmental significance of trace elements in the Athabasca Bituminous Sands: facts and misconceptions
Source: Royal Society of Chemistry journal article supplement (doi:10.1039/d2em00049k), 2022-01-01
Supplement: d2em00049k2.pdf [file d2em00049k2.pdf]

## APPENDIX B: FURTHER READING

### General Geochemistry

- Albarède, F. and A. W. Hofmann (2003). *Geochemistry : an introduction*. Cambridge , Cambridge Univ. Press.
- Eby, G. N. (2004). *Principles of environmental geochemistry*. Australia; Pacific Grove, CA, Thomson-Brooks/Cole.
- Fairbridge, R. W., Ed. (1972). *The encyclopedia of geochemistry and environmental sciences*. Encyclopedia of earth sciences series, 4a. New York , van Nostrand Reinhold Co.
- Faure, G. (1998). *Principles and applications of inorganic geochemistry: a comprehensive textbook for geology students*. Upper Saddle River, N.J., London, Prentice-Hall International.
- Gill, R. (1996). *Chemical fundamentals of geology*. London, Chapman & Hall.
- Goldschmidt, V. M. (1954). *Geochemistry*. Oxford, Clarendon Press.
- Holland, H. D. and K. K. Turekian (2004). *Treatise on geochemistry*. Oxford, UK ; San Diego, CA, USA, Elsevier Pergamon.
- Kesler, S. E., Ed. (2006). *Evolution of early earth's atmosphere, hydrosphere, and biosphere. Constraints from ore deposits*. Boulder, Colo, Geological Society of America.
- Killops, S. D. and V. J. Killops (2009). *An Introduction to Organic Geochemistry*, John Wiley & Sons Inc.
- Krauskopf, R. G. (2003). *Introduction to geochemistry*. New York, McGraw-Hill.
- Li, Y.-H. (2000). *A compendium of geochemistry : from solar nebula to the human brain*. Princeton, N.J., Princeton University Press.
- Mason, B. and C. B. Moore (1982). *Principles of geochemistry*. Smith and Wyllie intermediate geology series. New York, Wiley.
- McSween, H. Y., S. M. Richardson, et al. (2003). *Geochemistry : pathways and processes*. New York, Columbia University Press.
- Ottonello, G. (2000). *Principles of geochemistry*. New York, Columbia University Press.
- Ozima, M. and F. A. Podosek (2005). *Noble gas geochemistry*. Cambridge, Univ. Press.
- Rankama, K. and T. G. Sahama (1968). *Geochemistry*. Chicago, University of Chicago Press.
- Rollinson, H. R. (2008). *Early earth systems a geochemical approach*. Oxford , Blackwell.
- Sharp, Z. (2007). *Principles of stable isotope geochemistry*. Upper Saddle River, N.J., Pearson/Prentice Hall.
- Walther, J. V. (2005). *Essentials of geochemistry*. Sudbury, Mass. , Jones and Bartlett Publishers.
- Zhu, C. and G. M. Anderson (2002). *Environmental applications of geochemical modeling*. Cambridge, Cambridge University Press.
- Zou, H. (2007). *Quantitative Geochemistry*. London, Imperial College Press.

### Mineral Solubility Equilibria

- Garrels, R. M. and C. L. Christ (1990). Solutions, minerals and equilibria. Boston, Mass., Jones and Bartlett Publ.
- Lindsay, W. L. (1979). Chemical equilibria in soils. New York, Wiley.
- Sposito, G. (1981). The thermodynamics of soil solutions. Oxford , Clarendon Pr.
- Sposito, G. (1994). Chemical equilibria and kinetics in soils. New York , Oxford Univ. Press.

### **Weathering**

- Birkeland, P. W. (1974). Pedology, weathering, and geomorphological research. New York,, Oxford University Press.
- Bland, W. and D. Rolls (1998). Weathering. An introduction to the scientific principles. London, Arnold.
- Carroll, D. (1970). Rock weathering. New York, Plenum Press.
- Colman, S. M. and D. P. Dethier (1986). Rates of chemical weathering of rocks and minerals. Orlando, Academic Press.
- Dixon, J. and P. Xizhe (2006). Weathering and Soil Systems (Environmental Systems), Blackwell Publishers.
- Drever, J. I. (1985). The chemistry of weathering. Dordrecht ; Boston, Hingham, MA, D. Reidel Pub. Co.
- Drever, J. I. (2005). Surface & ground water, weathering & soils (Treatise on geochemistry series, Vol. 5), Elsevier Science.
- Kittrick, J. A. (1986). Soil mineral weathering. New York, Van Nostrand Reinhold.
- Loughnan, F. C. (1969). Chemical weathering of the silicate minerals. New York,, American Elsevier Pub. Co.
- Martini, I. P. and W. Chesworth (1992). Weathering, soils & paleosols. Amsterdam ; New York, Elsevier.
- Merrill, G. P. (1906). A treatise on rocks, rock-weathering and soils. New York, Macmillan.
- Nahon, D. B. (1991). Introduction to the petrology of soils and chemical weathering. New York, Wiley.
- Pain, C., Ed. (1999). Weathering and soils. Proceedings of the Fourth International Conference on Geomorphology ; Vol. 4. Berlin ; Stuttgart, Borntraeger.
- Paton, T. R. (1978). The formation of soil material. London ; Boston, G. Allen & Unwin.
- Paton, T. R. (1986). Perspectives on a dynamic Earth. London , Allen & Unwin.
- Sverdrup, H. U. (1990). The kinetics of base cation release due to chemical weathering. Lund, Lund University Press.
- Whalley, B. and P. J. McCreevy (2003). Weathering, Blackwell Publishers
- White, A. F., Ed. (1995). Chemical weathering rates of silicate minerals. Reviews in mineralogy 31. Washington, DC, Mineralogical Society of America.

### **Soil Chemistry**

- Bear, F. E. (1964). Chemistry of the soil. New York, Reinhold.

- Bohn, H. L., B. L. McNeal, et al. (2001). *Soil Chemistry*, Wiley.
- Dragun, J. (1998). *The Soil Chemistry of Hazardous Materials*, Amherst Scientific Publishing.
- Greenland, D. J., Ed. (1978). *The chemistry of soil constituents*. A Wiley-Interscience publication. Chichester , Wiley.
- Greenland, D. J. and M. H. B. Hayes (1981). *The Chemistry of Soil Processes*. Chichester, John Wiley & Sons
- Huang, P. M., Q. Huang, et al. (2008). *Soil mineral-microbe-organic interactions theories and applications*. Berlin, Springer.
- Iskandar, I. K. and M. B. Kirkham (2001). *Trace elements in soil: bioavailability, flux, and transfer*. Boca Raton, Fla., Lewis Publishers.
- Kabata-Pendias, A. and A. B. Mukherjee (2007). *Trace elements from soil to human*. Berlin ; Heidelberg , Springer.
- McNeal, B. L., G. A. O'Connor, et al. (2001). *Soil chemistry*. New York, Wiley.
- Nagy, N. M. and J. Konya (2009). *Interfacial chemistry of rocks and soils*. Boca Raton, Taylor & Francis.
- Pierzynski, G. M., J. T. Sims, et al. (2005). *Soils and environmental quality*. Boca Raton , CRC Press.
- Sparks, D. L. (2002). *Environmental Soil Chemistry*, Academic Press.
- Sposito, G. (2008). *The chemistry of soils*. New York, Oxford University Press.

### **Natural Water Chemistry**

- Berner, E. K. and R. A. Berner (1987). *The global water cycle : geochemistry and environment*. Englewood Cliffs, N.J., Prentice-Hall.
- Berner, E. K. and R. A. Berner (1996). *Global environment : water, air, and geochemical cycles*. Upper Saddle River, Prentice Hall.
- Burdige, D. J. (2006). *Geochemistry of marine sediments*. Princeton, NJ, Princeton University Press.
- Chapelle, F. (2001). *Ground water microbiology and geochemistry*. New York, Wiley.
- Chester, R. (2000). *Marine geochemistry*. Oxford , Blackwell Science.
- Drever, J. I. (1997). *Geochemistry of natural waters : surface and groundwater environments*. Upper Saddle River, N.J, Prentice-Hall.
- Fitts, C. R. (2002). *Groundwater science*. Amsterdam , Academic Press.
- Johannesson, K. H. (2005). *Rare earth elements in groundwater flow systems*. Dordrecht; New York, Springer.
- Kehew, A. E. (2001). *Applied chemical hydrogeology*. Upper Saddle River, N.J., Prentice Hall.
- Lake, L. W., S. L. Bryant, et al. (2002). *Geochemistry and fluid flow*. Amsterdam; New York, Elsevier Science Ltd.
- Lerman, A. (1979). *Geochemical processes : water and sediment environments*. New York, Wiley.
- Morel, F. and J. G. Hering (1993). *Principles and applications of aquatic chemistry*. New York ;

Chichester, Wiley.

Pankow, J. F. (1991). Aquatic chemistry concepts. Chelsea, Mich, Lewis Publishers.

Schulz, H. D., Ed. (2006). Marine geochemistry. Berlin ; Heidelberg [u. a.], Springer.

Snoeyink, V. L. and D. Jenkins (1980). Water chemistry. New York, Wiley.

Stumm, W. and J. J. Morgan (1996). Aquatic chemistry : chemical equilibria and rates in natural waters. New York ; Chichester, Wiley.

### **Geochemistry of Surfaces**

Birdi, K. S., Ed. (2009). Handbook of surface and colloid chemistry. Boca Raton, Fla. , CRC Press.

Hochella, M. F., A. F. White, et al. (1990). Mineral-water interface geochemistry. Washington, D.C, Mineralogical Society of America.

Perry, D. L. (1990). Instrumental surface analysis of geologic materials. New York, VCH.

Sposito, G. (1984). The surface chemistry of soils. New York, Oxford, Oxford University Press.

Sposito, G. (2004). The surface chemistry of natural particles. Oxford, Oxford University Press.

Stumm, W., L. Sigg, et al. (1992). Chemistry of the solid-water interface : processes at the mineral-water and particle-water interface in natural systems. New York ; Chichester, Wiley.

### **Biogeochemistry**

Ehrlich, H.L. Geomicrobiology. Marcel Dekker, New York, 1981, 393pp.

Krumbein, W.E. (ed.) Microbial Geochemistry. Blackwell, Oxford, 1983, 330pp.

Paul, E.A. and Clark, F.E. Soil Microbiology and Biochemistry. Academic Press, San Diego, 1989, 273pp.

Rheinheimer, G. Aquatic Microbiology, 3rd ed. John Wiley and Sons, New York, 1985, 257pp.

### **Environmental Geochemistry**

Adriano, D.C. Trace Elements in the Terrestrial Environment. Springer, Berlin and Heidelberg, 1986.

Bodek, I., Lyman, W.J., Reehl, W.F., Rosenblatt, D.H. (editors). Environmental Inorganic Chemistry. Properties, Processes, and Estimation Methods. Pergamon Press, New York and Oxford, 1988.

Bowen, H.J.M. Environmental chemistry of the elements. Academic Press, New York, 1979.

Brookins, D.G., Geochemical Aspects of Radioactive Waste Disposal, Springer-Verlag, New York, 1984.

Bunce, N.J. Environmental Chemistry. Wuerz Publishing, Winnipeg, Manitoba, 1990.

Förstner, U. and Wittmann, G.T.W. Metal Pollution in the Aquatic Environment. Springer, Berlin and Heidelberg, 1981.

Manahan, S. Environmental Chemistry, 4th ed. Brooks/Cole, Monterey, 1983.

O'Neill, P. Environmental Chemistry. George Allen and Unwin, London, 1985.

Salomons, W. and Förstner, U. Metals in the Hydrocycle. Springer, Berlin and Heidelberg, 1984.

Speidel, D.H. and Agnew, A.F. The Natural Geochemistry of Our Environment. Westview Press, Golden, Colorado, 1982.
